# Supplementary material for: Impacts of temperature and soil characteristics on methane production and oxidation in Arctic polygonal tundra
Source: Copernicus journal article supplement (doi:10.5194/bg-2017-566), 2018-01-29

**Supplementary material for**  
**Impacts of temperature and soil characteristics on methane production**  
**and oxidation in Arctic polygonal tundra**

**Jianqiu Zheng<sup>1</sup>, Taniya RoyChowdhury<sup>1,2</sup>, Ziming Yang<sup>3,4</sup>, Baohua Gu<sup>3</sup>, Stan D. Wullschleger<sup>3,5</sup>, David E. Graham<sup>1,5</sup>**

<sup>1</sup> Biosciences Division, Oak Ridge National Laboratory, Oak Ridge, Tennessee, 37831, USA

<sup>2</sup> Now at Department of Environmental Science & Technology, University of Maryland, College Park, Maryland, 20742, USA

<sup>3</sup> Environmental Sciences Division, Oak Ridge National Laboratory, Oak Ridge, Tennessee, 37831, USA

<sup>4</sup> Now at Department of Chemistry, Oakland University, Rochester, Michigan, 48309, USA

<sup>5</sup> Climate Change Science Institute, Oak Ridge National Laboratory, Oak Ridge, Tennessee, 37831, USA

*Correspondence to:* David E. Graham ([grahamde@ornl.gov](mailto:grahamde@ornl.gov))

**Table S1.** Physicochemical characteristics of soils from FCP and HCP

|            | Depth (cm) | Layer           | Water content<br>(g g <sup>-1</sup> ) | pH (KCl) | Fe(II)<br>μmol g <sup>-1</sup> soil | Total C<br>(%) | C:N |
|------------|------------|-----------------|---------------------------------------|----------|-------------------------------------|----------------|-----|
| <b>FCP</b> | 10-30      | Active          | 0.44                                  | 4.24     | 9.72                                | 18.56          | 18  |
|            | 40-50      | Transition zone | 2.48                                  | 4.86     | 50.20                               | 5.80           | 16  |
|            | 50-70      | Permafrost      | 3.95                                  | 4.95     | 68.95                               | 30.83          | 18  |
| <b>HCP</b> | 10-30      | Active          | 0.67                                  | 4.70     | 14.36                               | 20.49          | 21  |
|            | 50-70      | Permafrost      | 4.43                                  | 5.72     | 79.37                               | 17.10          | 21  |

**Table S2.** Fitted parameters for CH<sub>4</sub> production with linear model ( $C=A \times t+B$ ).

| Horizon             | Temperature | model  | A      | B      | R <sup>2</sup> |
|---------------------|-------------|--------|--------|--------|----------------|
| FCP Transition zone | +8          | Linear | 0.0685 | 0.0372 | 0.94           |
|                     | +4          | Linear | 0.0427 | 0.2133 | 0.81           |
|                     | -2          | Linear | 0.0166 | 0.1751 | 0.92           |
| FCP Permafrost      | +8          | Linear | 0.0074 | 0.1039 | 0.79           |
|                     | +4          | Linear | 0.0060 | 0.0758 | 0.76           |
|                     | -2          | Linear | 0.0043 | 0.0895 | 0.73           |

Table S3. Fitted parameters for CO<sub>2</sub> production using best-fit Hyperbolic ( $C=A \times t/(B+t)$ ), Linear ( $C=A \times t+B$ ), or Sigmoidal ( $C=A \times t^d/(B^d+t^d)$ ) models.

| Horizon             | Temperature | model      | A       | B      | d     | R <sup>2</sup> |
|---------------------|-------------|------------|---------|--------|-------|----------------|
| FCP Active          | +8          | Hyperbolic | 545.19  | 53.60  | -     | 0.85           |
|                     | +4          | Hyperbolic | 1588.17 | 545.18 | -     | 0.91           |
|                     | -2          | Linear     | 1.70    | 6.96   | -     | 0.95           |
| FCP Transition zone | +8          | Hyperbolic | 32.18   | 13.30  | -     | 0.82           |
|                     | +4          | Hyperbolic | 28.35   | 16.11  | -     | 0.78           |
|                     | -2          | Hyperbolic | 12.09   | 2.82   | -     | 0.47           |
| FCP Permafrost      | +8          | Hyperbolic | 48.52   | 14.63  | -     | 0.84           |
|                     | +4          | Hyperbolic | 67.51   | 38.05  | -     | 0.67           |
|                     | -2          | Hyperbolic | 45.80   | 32.55  | -     | 0.87           |
| HCP Active          | +8          | Sigmoidal  | 31.12   | 57.19  | 1.85  | 0.96           |
|                     | +4          | Sigmoidal  | 17.10   | 44.42  | 2.32  | 0.87           |
|                     | -2          | Sigmoidal  | 6.48    | 33.48  | 5.12  | 0.91           |
| HCP Permafrost      | +8          | Sigmoidal  | 3.69    | 50.56  | 25.43 | 0.90           |
|                     | +4          | Sigmoidal  | 3.81    | 52.71  | 18.00 | 0.81           |
|                     | -2          | Sigmoidal  | 1.93    | 51.50  | 10.48 | 0.98           |

**Figure S1.** Fe(II) concentrations and soil porewater dissolved CH<sub>4</sub> measured at 10 cm intervals from (a) FCP and (b) HCP

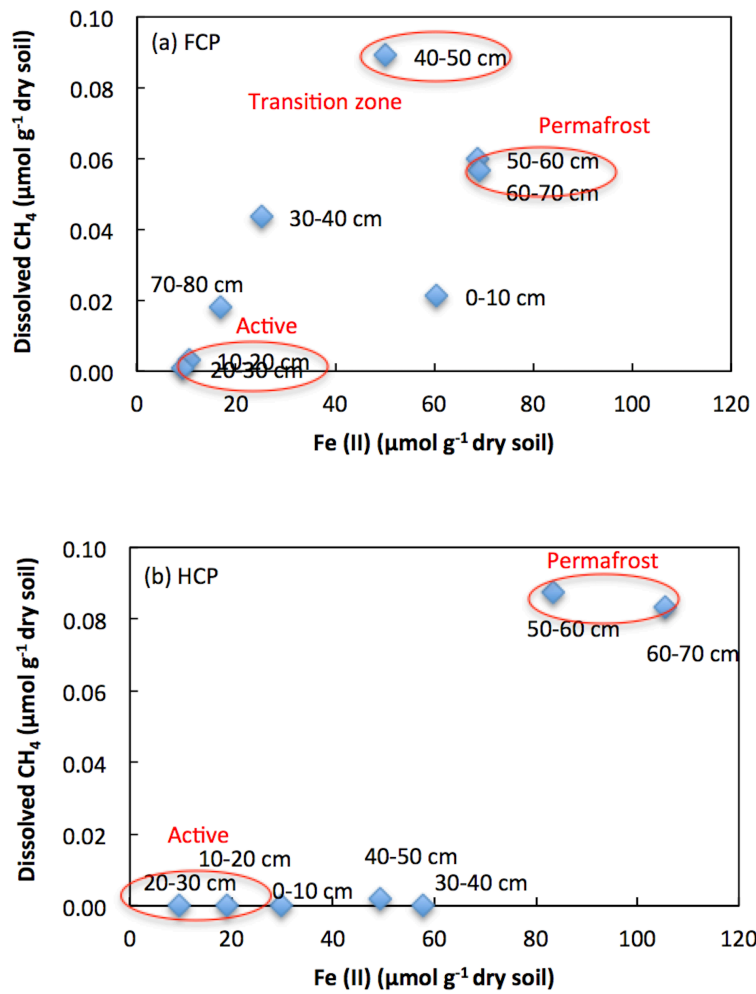

**Figure S2.** CH<sub>4</sub> production in soil microcosm from organic and permafrost layers of HCP and organic layer of FCP.

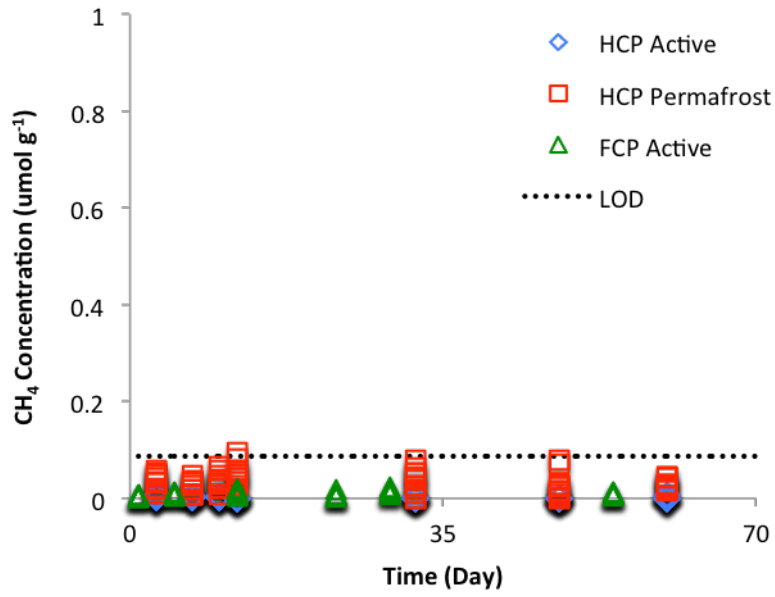

Supplement: Supplementary file 1 [file bg-2017-566-supplement.pdf]
